# Supplementary material for: Inert gas condensation made bimetallic FeCu nanoparticles – plasmonic response and magnetic ordering
Source: Royal Society of Chemistry journal article supplement (doi:10.1039/d3tc02630b), 2024-01-01
Supplement: d3tc02630b1.pdf [file d3tc02630b1.pdf]

## Supporting Information

### Inert Gas Condensation made bimetallic FeCu nanoparticles - plasmonic response and magnetic ordering

Kamila Kollbek, Piotr Jabłoński, Marcin Perzanowski, Dominika Święch, Marcin Sikora, Grzegorz Słowik, Mateusz Marzec, Marta Gajewska, Czesława Paluszkiwicz and Marek Przybylski

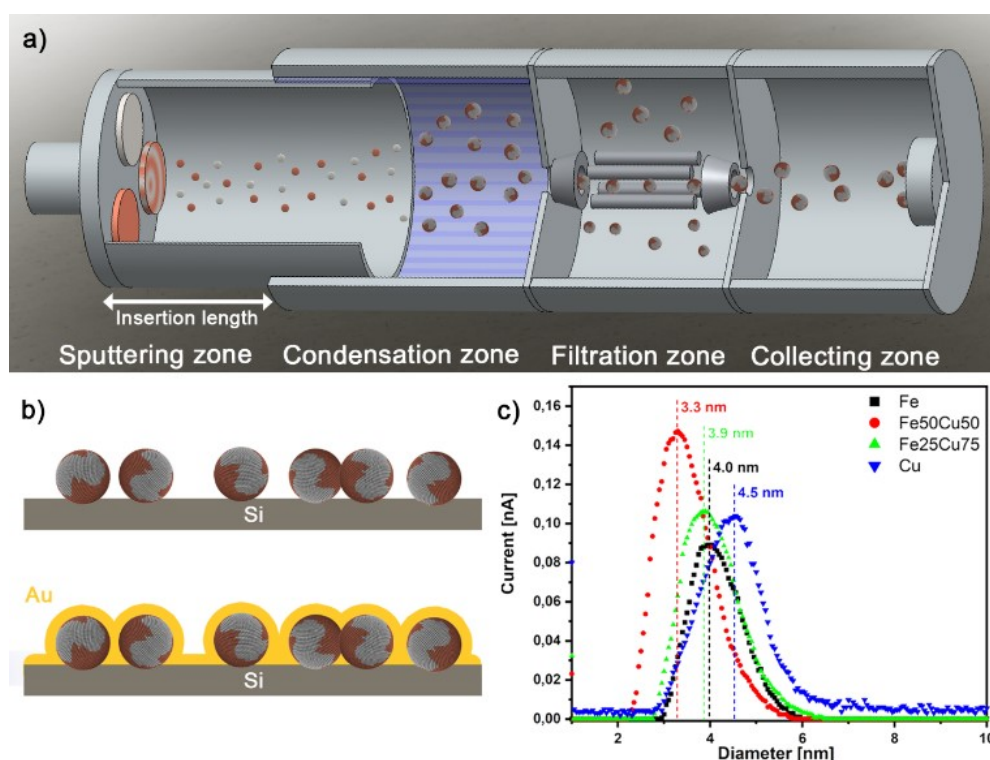

Figure S1 Schematic view of a) the vacuum deposition system based on IGC technique containing the NPs source (Mantis Deposition Ltd), b) two type of deposited systems: NPs without (top) and with 3 nm thick film of Au (bottom). c) Distribution of the electrical current carried by Cu, Fe and bimetallic FeCu NPs collected at the exit grid of the quadrupole mass spectrometer as a function of the diameter of the selected mass of NPs. The frequency of the quadrupole mass spectrometer at which the electrical current reaches a maximum (given by dashed vertical line) was chosen as a desired NPs diameter.

Table S1 Deposition parameters for studied NPs.

| Sample   | Working pressure [mTorr] | Input current [mA] | Argon flow [sccm] | Insertion length [mm] | Time [min] |
|----------|--------------------------|--------------------|-------------------|-----------------------|------------|
| Fe       | 4.7                      | 70                 | 70                | 10                    | 40         |
| Fe50Cu50 | 5.1                      | 100                | 100               | 0                     | 40         |
| Fe25Cu75 | 5.0                      | 100                | 100               | 0                     | 40         |
| Cu       | 60.0                     | 110                | 100               | 30                    | 40         |

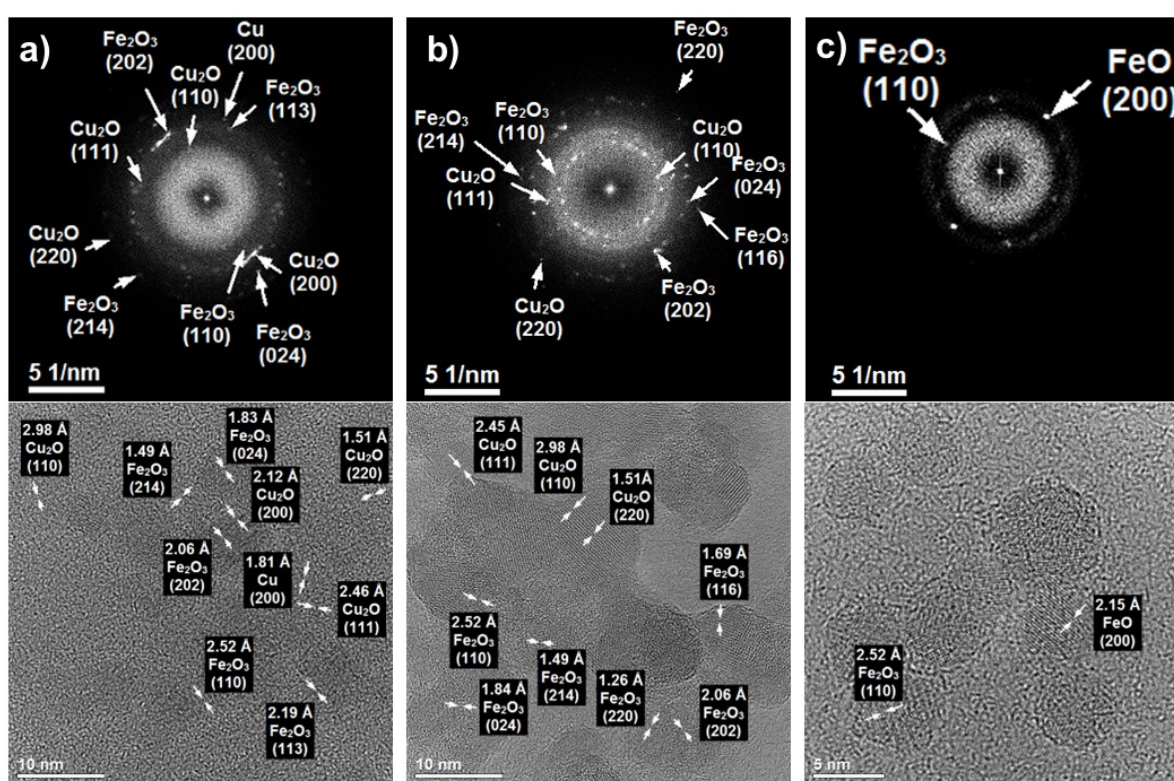

Figure S2 HR-TEM image of the iron, copper and bimetallic a) Fe<sub>50</sub>Cu<sub>50</sub> b) Fe<sub>25</sub>Cu<sub>75</sub>, c) Fe NPs with the proposed lattice planes of the detected structural phases together with the electron diffraction pattern.

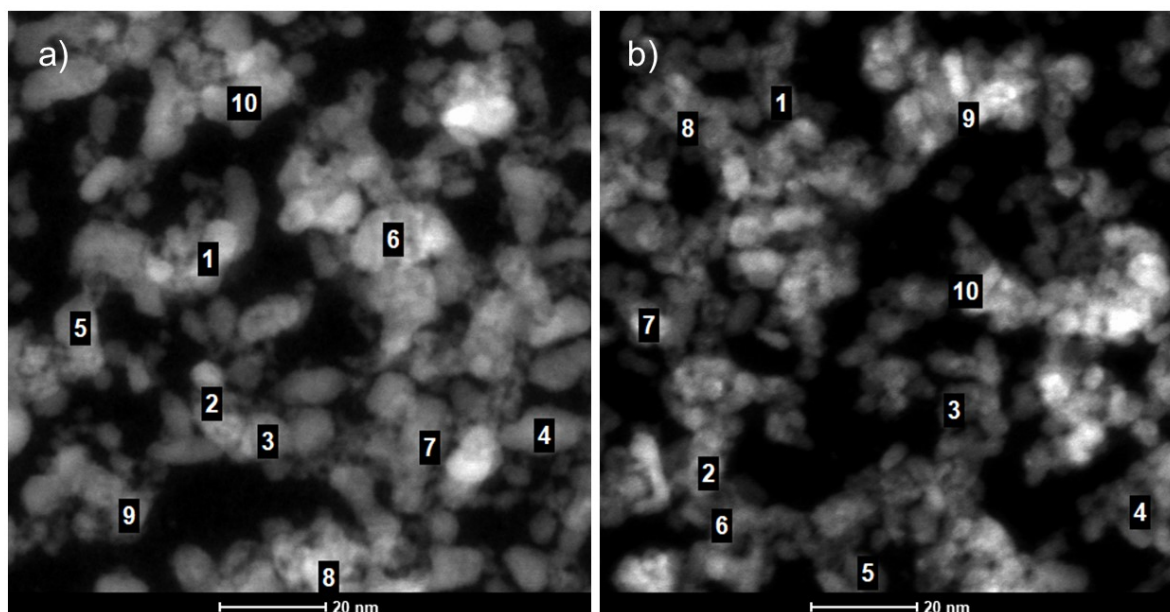

Figure S3 SEM image with marked 10 nanoparticles for which EDS analysis was performed for a) Fe<sub>25</sub>Cu<sub>75</sub> and b) Fe<sub>50</sub>Cu<sub>50</sub> NPs.

Table S2 The atomic% content of Cu and Fe in the studied bimetallic samples of Fe<sub>25</sub>Cu<sub>75</sub>, Fe<sub>50</sub>Cu<sub>50</sub> NPs based on the EDS method for 10 selected nanoparticles.

| Fe <sub>25</sub> Cu <sub>75</sub> |                 |                 | Fe <sub>50</sub> Cu <sub>50</sub> |                 |                 |
|-----------------------------------|-----------------|-----------------|-----------------------------------|-----------------|-----------------|
| No                                | Cu (atomic %)   | Fe (atomic %)   | No                                | Cu (atomic %)   | Fe (atomic %)   |
| 1                                 | 74.8            | 25.2            | 1                                 | 55.6            | 44.4            |
| 2                                 | 68.4            | 31.6            | 2                                 | 50.4            | 49.6            |
| 3                                 | 76.3            | 23.7            | 3                                 | 46.1            | 53.9            |
| 4                                 | 80.5            | 19.5            | 4                                 | 49.2            | 50.8            |
| 5                                 | 76.8            | 23.2            | 5                                 | 56.7            | 43.3            |
| 6                                 | 73.4            | 26.6            | 6                                 | 58.7            | 41.3            |
| 7                                 | 76.7            | 23.3            | 7                                 | 45.7            | 54.3            |
| 8                                 | 76.6            | 23.4            | 8                                 | 41.3            | 58.7            |
| 9                                 | 77.9            | 22.1            | 9                                 | 56.4            | 43.6            |
| 10                                | 77.7            | 22.3            | 10                                | 56.3            | 43.7            |
| <b>Average</b>                    | <b>75.9±3.2</b> | <b>24.1±3.2</b> | <b>Average</b>                    | <b>51.6±5.9</b> | <b>48.4±5.9</b> |

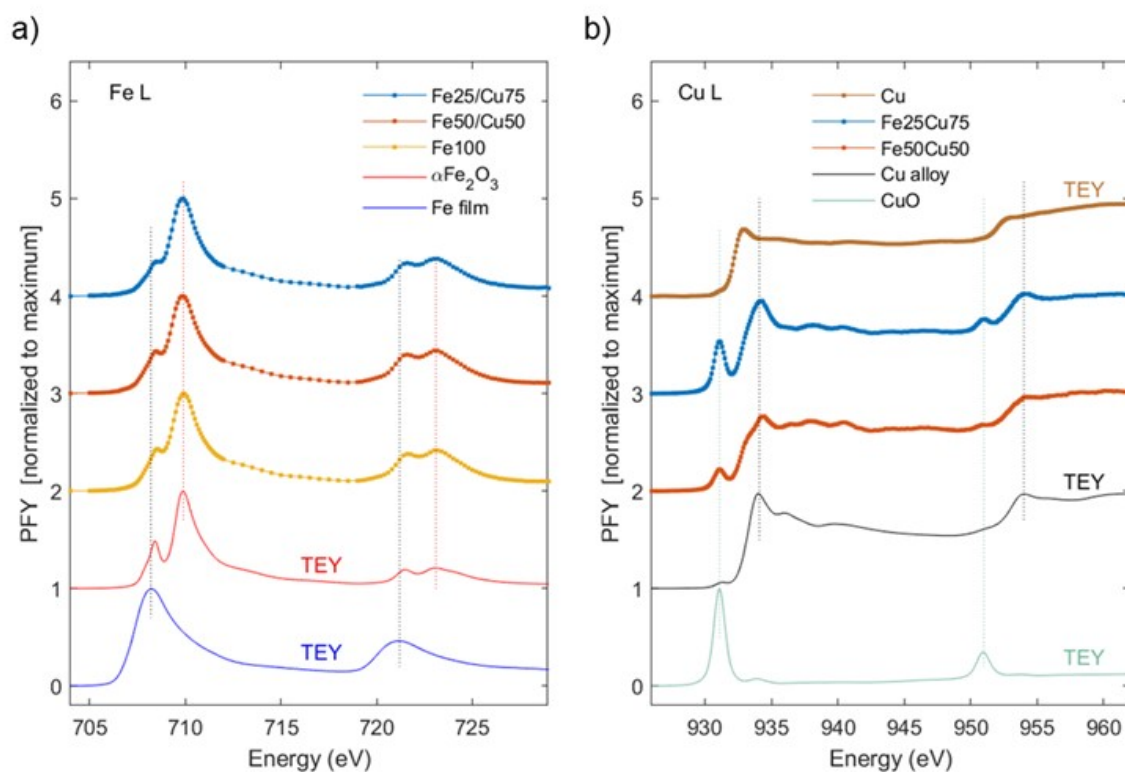

Figure S4 PFY XAS at Fe and Cu L absorption edges. Chemical and structural characteristics of FeCu NPs can be deduced by comparison with spectra of reference samples, namely iron(III) oxide and metallic film as well as copper(II) oxide and CuO.

Table S3. Wavenumbers and proposed band assignment for the Raman, FT-IR, SERS and SEIRA spectra of Phe adsorbed onto Cu, Fe25Cu75, and Fe50Cu50 NPs.

| Assignment                                                             | Wavenumber [cm <sup>-1</sup> ] |       |         |       |               |       |               |       |
|------------------------------------------------------------------------|--------------------------------|-------|---------|-------|---------------|-------|---------------|-------|
|                                                                        | Phe Raman                      | FT-IR | Cu SERS | SEIRA | Fe25Cu75 SERS | SEIRA | Fe50Cu50 SERS | SEIRA |
| $\nu(\text{NH})$                                                       | 3169                           |       |         |       |               |       |               |       |
| $\nu(\text{NH})$                                                       |                                | 3125  |         | 3120  |               |       |               |       |
| $\nu_2, \nu(\text{CH})_{\text{ring}}$                                  | 3065                           | 3060  | 3061    | 3061  | 3059          |       | 3061          |       |
| $\nu(\text{CH})$                                                       | 3040                           | 3028  | 3034    | 3030  | 3039          | 3030  |               | 3030  |
| $\nu_{\text{as}}(\text{CH})$                                           | 2967                           |       | 2962    |       |               |       | 2967          |       |
| $\nu_{\text{as}}(\text{CH})$                                           | 2927                           | 2918  | 2925    |       | 2938          | 2918  | 2923          | 2922  |
| $\nu_{\text{s}}(\text{CH})$                                            | 2858                           |       | 2867    |       | 2870          |       | 2860          |       |
| $\rho_{\text{bas}}(\text{NH})$                                         |                                | 1634  |         |       |               |       |               |       |
| $\nu_{8a} \nu(\text{CC})_{\text{ring i. p.}}$                          | 1600                           | 1609  | 1604    | 1605  | 1604          | 1603  | 1601          | 1604  |
| $\nu_{\text{as}}(\text{COO}); \nu_{8b} \nu(\text{CC})_{\text{ring}}$   | 1583                           | 1589  | 1583    | 1585  | 1583          | 1579  | 1585          | 1580  |
| $\nu_{19a} \nu(\text{CC})_{\text{ring}}; \rho_{\text{bs}}(\text{NH})$  |                                | 1503  |         | 1497  |               | 1518  |               | 1518  |
| $\nu_{19b} \nu(\text{CC})_{\text{ring}}; \rho_{\text{s}}(\text{CH}_2)$ | 1445                           | 1448  | 1439    | 1455  | 1451          | 1456  | 1438          | 1457  |
| $\nu_{\text{s}}(\text{COO})$                                           | 1408                           | 1408  |         | 1402  |               | 1398  |               | 1399  |
| $\nu_3$                                                                | 1340                           | 1366  |         | 1365  |               | 1345  |               |       |
| $\delta(\text{CO})$                                                    | 1306                           | 1325  | 1318    | 1322  | 1324          | 1314  | 1312          | 1313  |
| $\nu_{7a}$                                                             | 1212                           | 1210  | 1209    | 1208  | 1206          |       | 1212          | 1207  |

|                                         |                                                                                                                                                                                                   |      |      |      |      |      |      |
|-----------------------------------------|---------------------------------------------------------------------------------------------------------------------------------------------------------------------------------------------------|------|------|------|------|------|------|
| $\nu_{9a}$                              | 1182                                                                                                                                                                                              | 1197 | 1177 | 1195 |      | 1182 | 1162 |
| $\delta$ (CH)                           |                                                                                                                                                                                                   | 1143 |      |      |      |      |      |
| $\nu$ (CN)                              |                                                                                                                                                                                                   | 1074 |      | 1073 |      | 1073 | 1074 |
| $\nu_{18a, i. p.}$                      | 1035                                                                                                                                                                                              | 1028 | 1029 |      | 1028 | 1031 | 1032 |
| $\nu_{12}$                              | 1002                                                                                                                                                                                              |      | 1001 |      | 1000 |      | 1002 |
| $\nu$ (COO)                             | 912                                                                                                                                                                                               |      |      |      |      |      |      |
| $\delta_{o.o.p.}(C-H)_{ring}$           | 850                                                                                                                                                                                               |      |      |      |      |      |      |
| $\rho_r(CH_2)$                          | 832                                                                                                                                                                                               |      | 822  |      | 810  |      | 824  |
| $\delta$ (ring)                         |                                                                                                                                                                                                   |      | 773  |      | 773  |      |      |
| $\nu_{11}, \delta_{o.o.p.}(C-H)_{ring}$ | 745                                                                                                                                                                                               |      | 745  |      | 746  |      | 744  |
| $\rho_r$ (COO)                          | 682                                                                                                                                                                                               |      | 672  |      | 667  |      | 668  |
| $\nu_{6b}$                              | 619                                                                                                                                                                                               |      | 619  |      | 619  |      | 620  |
| Abbreviations:                          | $\nu$ – stretching, $\delta$ – deformation, $\rho_b$ – bending, $\rho_r$ – rocking, $\rho_s$ – scissoring, i.p. – in-plane, o.o.p. – out-of-plane, s – symmetric, and as – asymmetric vibrations; |      |      |      |      |      |      |
